# Supplementary material
Source: publisher figshare collection journal article supplement (https://acs.figshare.com/ndownloader/files/12487106)
Supplement: Supplementary file 1 [file 12487106]

# Supporting Information

## Visible light-erasable oxide FET-based non-volatile memory operated with deep trap interface

*Taeyoon Kim<sup>†,‡</sup>, Jung Wook Lim<sup>†,‡,\*</sup>, Seong Hyun Lee<sup>†</sup>, Jeho Na<sup>†</sup>, Jiwoon Jeong<sup>†</sup>, Kwang Hoon Jung<sup>†,‡</sup>, Gayoung Kim<sup>†,‡</sup>, and Sun Jin Yun<sup>†,‡,\*</sup>*

<sup>†</sup> ICT Materials Research Group, Materials & Components Basic Research Division, Electronics and Telecommunications Research Institute (ETRI), 218 Gajeong-ro, Yuseong-gu, Daejeon 305-700, South Korea

<sup>‡</sup> Department of Advanced Device Engineering, University of Science and Technology, 217 Gajeong-ro, Yuseong-gu, Daejeon 305-350, South Korea

\*Corresponding authors: J. W. Lim, [limjw@etri.re.kr](mailto:limjw@etri.re.kr); S. J. Yun, [sjyun@etri.re.kr](mailto:sjyun@etri.re.kr)

### **PEALD and in-situ H<sub>2</sub>-plasma treatment**

Figure S1 shows the pulse sequence of the PEALD used to deposit the Al<sub>2</sub>O<sub>3</sub> and TiO<sub>2</sub> films.<sup>1,2</sup> The Al and Ti metal precursors were trimethyl aluminum (TMA) and titanium (IV) tetraisopropoxide (TTIP), respectively, and O<sub>2</sub> plasma was used as the oxygen source. The reservoirs of TMA and TTIP were kept at 25 °C and 70 °C, respectively. Argon carrier gas was supplied with a flow rate of 100 sccm. The Al<sub>2</sub>O<sub>3</sub> and TiO<sub>2</sub> films were deposited at a temperature and RF power of 300 °C and 150 W, respectively. The growth rates of Al<sub>2</sub>O<sub>3</sub> and TiO<sub>2</sub> were 1.11 Å per cycle and 0.46 Å per cycle, respectively. For the in-situ H<sub>2</sub>-plasma treatment, hydrogen was supplied with a flow rate of 200 sccm, and the same temperature and RF power were used.

### **Surface roughness of Al<sub>2</sub>O<sub>3</sub> and TiO<sub>2</sub> films measured using AFM**

Figure S2 (a) and (b) show the 2D and 3D AFM images, respectively, of an 80 nm Al<sub>2</sub>O<sub>3</sub> thin film deposited by PEALD at 300 °C on a Si substrate. The average surface roughness was 0.21 nm, indicating that the Al<sub>2</sub>O<sub>3</sub> thin film had a very flat surface, even at a thickness of 80 nm. Figure S2 (c) and (d) show AFM images of a 30 nm TiO<sub>2</sub> thin film deposited by PEALD at 300 °C on the Al<sub>2</sub>O<sub>3</sub> film. The surface roughness value increased to 1.68 nm after TiO<sub>2</sub> deposition. This means that the 30 nm TiO<sub>2</sub> was crystallized (anatase phase) on the Al<sub>2</sub>O<sub>3</sub> film during deposition at 300 °C.

### **Characterization of the electrical properties of the TOFDI TiO<sub>2</sub> flash memory devices.**

The threshold voltage ( $V_{th}$ ) of 0.5 V was calculated from the slope of the square root of the drain current ( $I_D^{1/2}$ ) vs.  $V_G$  curve shown in Figure 4 (c). The field-effect mobility ( $\mu_{FE}$ ) for the device with a channel length/width ( $L/W$ ) = 10  $\mu\text{m}/40 \mu\text{m}$ , as shown in Figure 4 (c), was 1.2  $\text{cm}^2\text{V}^{-1}\text{s}^{-1}$ ,

superior to the values previously reported for TiO<sub>2</sub> MOSFETs ( $\mu_{FE}$ : 0.672 cm<sup>2</sup>V<sup>-1</sup>s<sup>-1</sup>) fabricated using ALD.<sup>3</sup> The  $\mu_{FE}$  was determined using the following equation<sup>4</sup>:

$$\mu_{FE} = \frac{Lg_m}{WC_{ox}V_D} \quad (1)$$

where,  $g_m$  and  $C_{ox}$  are the transconductance (obtained from  $I_D$  vs.  $V_G$  curves) and the capacitance per unit area of the gate insulator, respectively.

### **Electrical characteristics of the devices fabricated with and without H<sub>2</sub> treatment**

Figure S3 (a) and (b) show the hysteresis of the transfer curves for the devices prepared with and without H<sub>2</sub> treatment. From the forward ( $V_G = -20$  to 30 V) and subsequent reverse sweeps (30 to -20 V), the samples with and without H<sub>2</sub> plasma treatment typically showed clockwise hysteresis. This indicates that the trapped mobile carriers were a dominant factor contributing to the hysteresis.<sup>5</sup> The magnitude of the threshold voltage shift ( $\Delta V_{th}$ ) for the sample without H<sub>2</sub> treatment was 9.5 V, while those for the H<sub>2</sub>-treated samples at 12 s and 24 s were 5 V and 3 V, respectively, as shown in Table S1. The magnitude of  $\Delta V_{th}$  did not decrease further as the treatment time increased to 36 s. This demonstrated that the hydrogen atoms effectively passivated the shallow trap sites.

### **Breakdown characteristic curve of Al<sub>2</sub>O<sub>3</sub> and the gate current measured with the programming voltage**

The breakdown characteristic curve of 80 nm-thick Al<sub>2</sub>O<sub>3</sub> was measured, as shown in Figure S4(a). In the previous paper published in our group, the breakdown electric field of 30 nm-thick Al<sub>2</sub>O<sub>3</sub> deposited using the same equipment as this experiment was 10 MV/cm.<sup>6</sup> Similarly, the breakdown electric field of 80 nm-thick Al<sub>2</sub>O<sub>3</sub> was 10 MV/cm (Figure S4(a)). Also, we

measured the gate current with the programming voltage of 50 V (Figure S4(b)). This result shows that gate current ( $I_G$ ) were 5-orders of magnitude lower than  $I_D$ .

### **Energy band diagrams and memory operations**

To well understand the electrical program and VL erase mechanisms of the TOFDI  $\text{TiO}_2$  memory, we added the energy band diagrams and memory operations. Figure S5(a) shows energy band diagrams and initial state in the TOFDI  $\text{TiO}_2$  memory. Note that the shallow level trap and deep level trap at the interface are relative concepts. The trap levels above  $E_F$  is referred to as the shallow level and the one below  $E_F$  is referred to as the deep level.<sup>7,8</sup> In Figure S5(b), when a positive  $V_G$  pulse was applied for programming the memory, shallow and deep trap sites at the interface between  $\text{TiO}_2$  and  $\text{Al}_2\text{O}_3$  capture electrons in the channel. The trapped electrons recombine with holes photo-generated by the VL irradiation (Figure S5(c)) to form neutral trap sites, and the initial state can be fully recovered (Figure S5(a)).

### **Cycling tests of the TOFDI $\text{TiO}_2$ memory**

The cycling tests for 100 times were performed, as shown in Figure S6. We cautiously claim that the cycling tests for 100 times show the stability of memory operation pretty well because the degradation of device characteristics usually occurs very early.

## Supplementary Table and Figures

**Table S1.** Electrical properties of TOFDI TiO<sub>2</sub> flash memory devices prepared with or without H<sub>2</sub> treatment.

| H <sub>2</sub> treatment<br>time | $\mu_{\text{FE}}$<br>(cm <sup>2</sup> V <sup>-1</sup> s <sup>-1</sup> ) | V <sub>th</sub><br>(V)    | On/off ratio | Hysteresis<br>( $\Delta V_{\text{th}}$ ) |
|----------------------------------|-------------------------------------------------------------------------|---------------------------|--------------|------------------------------------------|
| 0 s                              | 1.2 ( $\sigma = 0.09$ )                                                 | - 0.5 ( $\sigma = 1$ )    | $\sim 10^7$  | 9.0 ( $\sigma = 0.61$ )                  |
| 12 s                             | 1.5 ( $\sigma = 0.09$ )                                                 | - 2.0 ( $\sigma = 0.35$ ) | $\sim 10^7$  | 5.1 ( $\sigma = 0.55$ )                  |
| 24 s                             | 1.4 ( $\sigma = 0.04$ )                                                 | - 2.7 ( $\sigma = 0.42$ ) | $\sim 10^7$  | 3.1 ( $\sigma = 0.47$ )                  |
| 36 s                             | 1.4 ( $\sigma = 0.10$ )                                                 | - 3.1 ( $\sigma = 0.22$ ) | $\sim 10^7$  | 3.2 ( $\sigma = 0.21$ )                  |

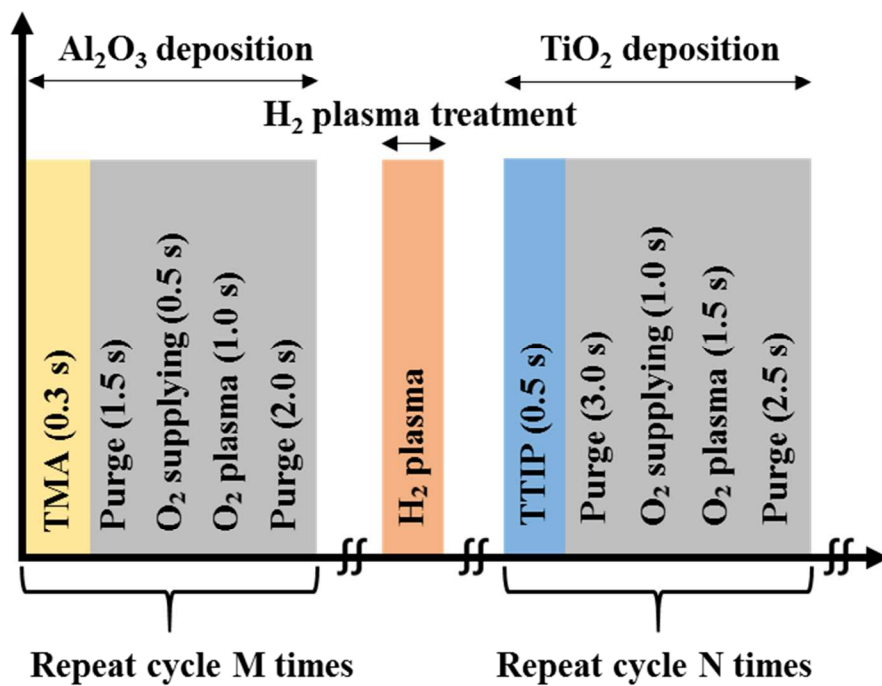

**Figure S1.** Schematic diagram showing the PEALD process and in-situ  $\text{H}_2$  plasma treatment process for preparing the  $\text{Al}_2\text{O}_3$  and  $\text{TiO}_2$  films.

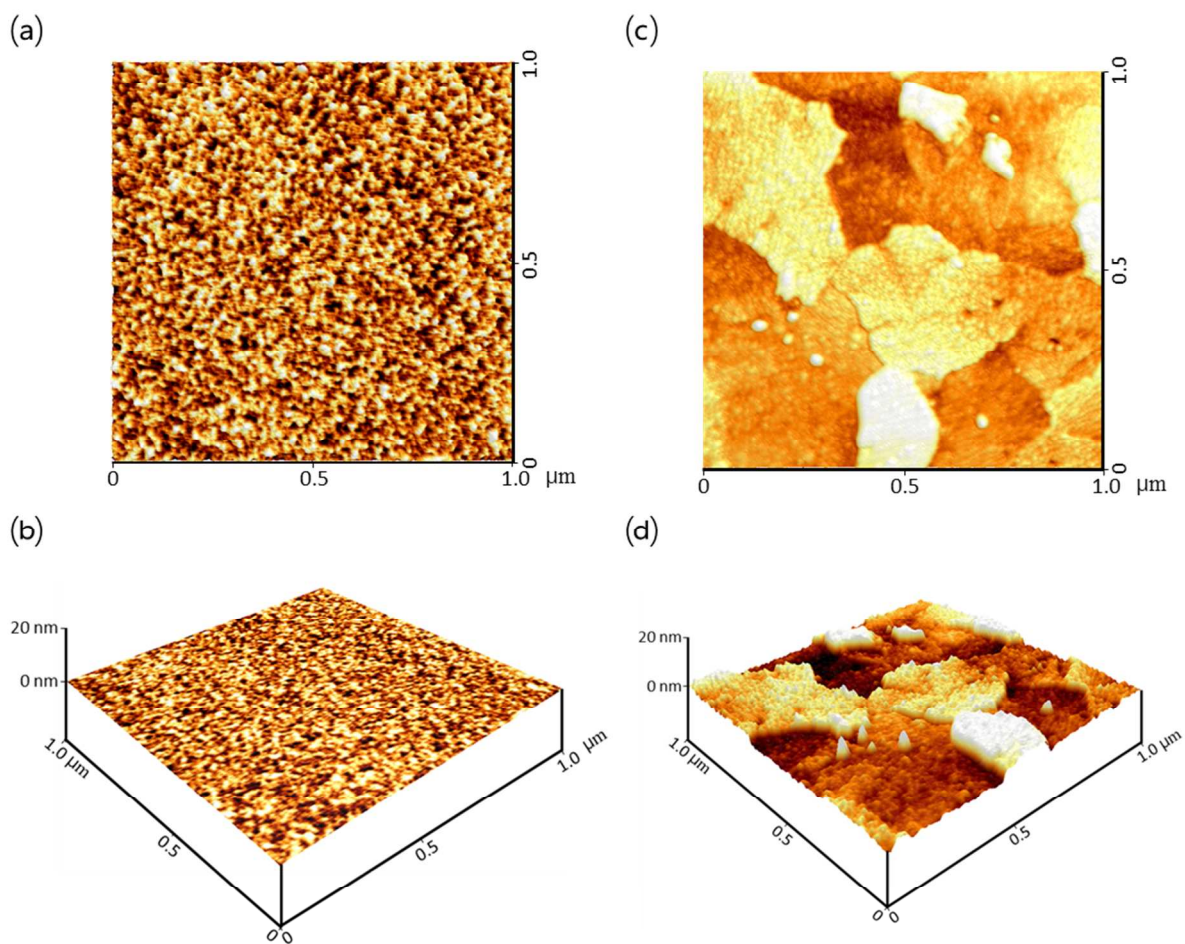

**Figure S2.** (a, c) 2D and b, d) 3D AFM micrographs ( $1\ \mu\text{m} \times 1\ \mu\text{m}$ ) for (a, b)  $\text{Al}_2\text{O}_3$  thin films deposited on Si substrates and (c, d)  $\text{TiO}_2$  thin films deposited onto the  $\text{Al}_2\text{O}_3$  films. The root mean square (rms) surface roughness of the  $\text{Al}_2\text{O}_3$  and  $\text{TiO}_2$  films are 0.21 nm and 1.68 nm, respectively.

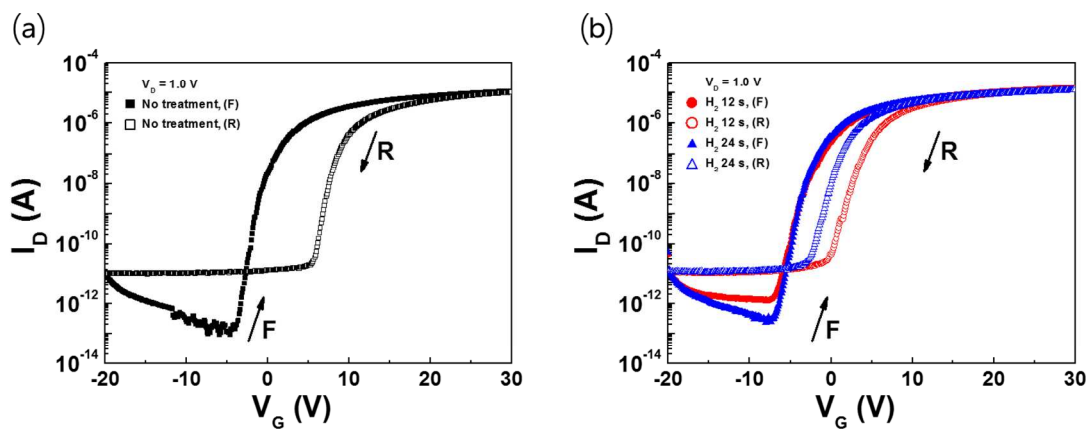

**Figure S3.** Transfer characteristics of TiO<sub>2</sub> MOSFETs with (a) no H<sub>2</sub>-treatment and (b) under various H<sub>2</sub> treatment conditions, where F and R refer to forward and reverse directions, respectively.



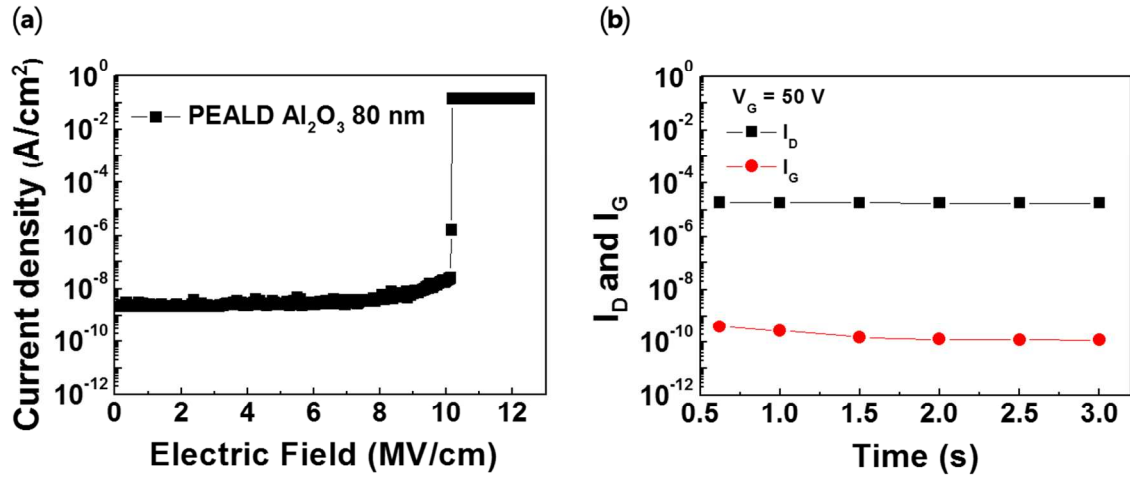

Figure S4 (a) breakdown characteristic curve of  $\text{Al}_2\text{O}_3$  and (b) the gate current measured with the programming voltage of 50 V ( $L/W = 10 \mu\text{m}/40 \mu\text{m}$ ).

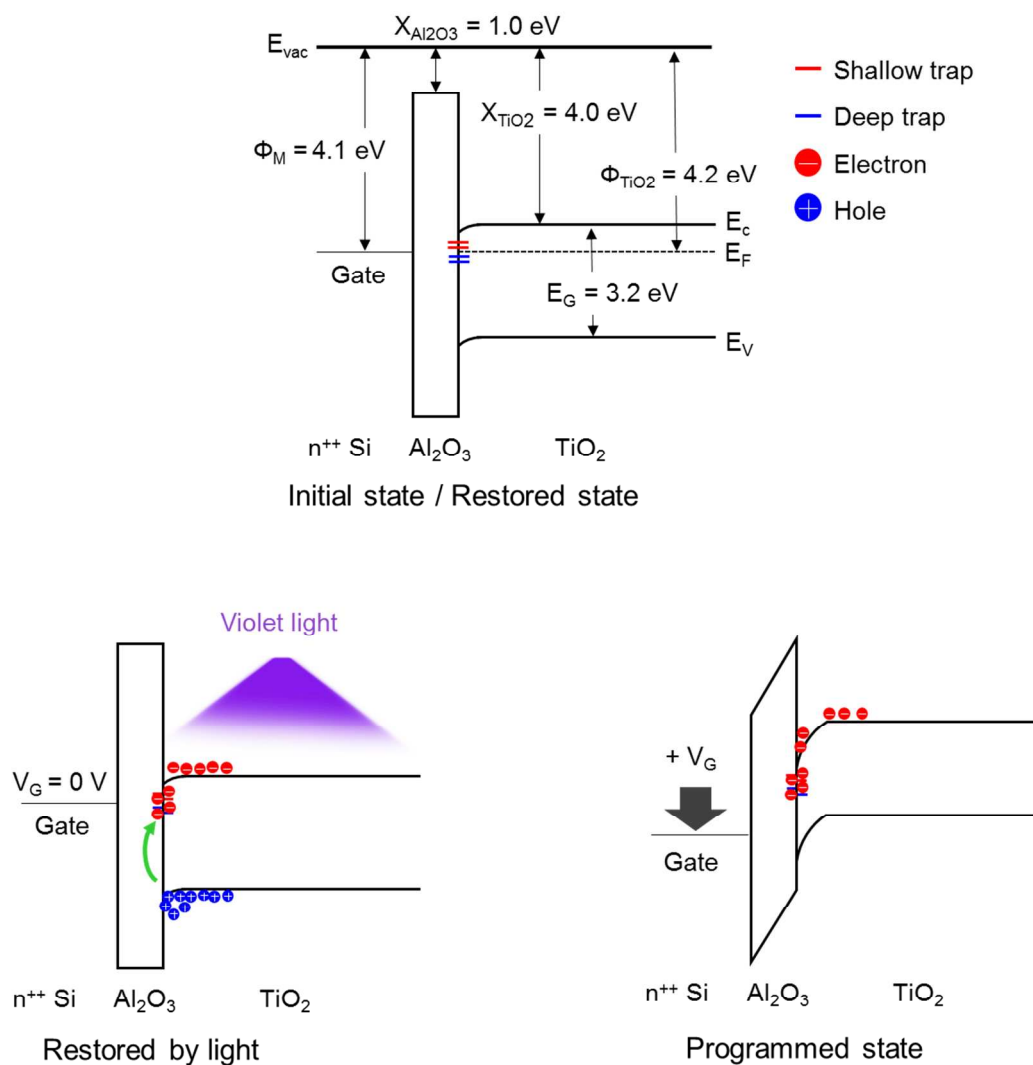

Figure S5. Schematic illustration of the mechanisms of the restoration procedure of the device, depicting the (a) initial state, (b) saturated state and (c) restoration by VL irradiation. ( $\Phi_M$  : The work function of gate metal,  $\Phi_{TiO_2}$  : The work function of TiO<sub>2</sub>,  $X_{Al_2O_3}$  : The electron affinity of Al<sub>2</sub>O<sub>3</sub>,  $X_{TiO_2}$  : The electron affinity of TiO<sub>2</sub>,  $E_g$  = Energy band gap,  $E_c$  = conduction band energy,  $E_F$  = Fermi energy level,  $E_v$  = valance band energy)

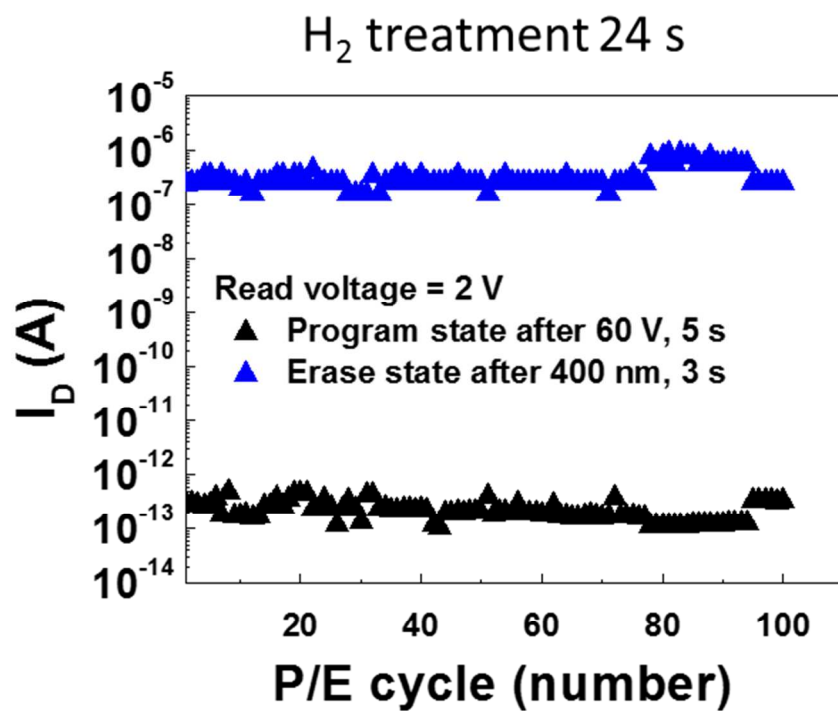

Figure S6. Program/erase (P/E) cycling tests of the TOFDI  $TiO_2$  memory showing high reliability.

## Supplementary references

- [1] Lim, J. W.; Yun, S. J. Electrical Properties of Alumina Films by Plasma-Enhanced Atomic Layer Deposition. *Electrochem. Solid State Lett.* **2004**, 7, F45–F48.
- [2] Lim, J. W.; Yun, S. J.; Lee, J. H. Characteristics of TiO<sub>2</sub> Films Prepared by ALD With and Without Plasma. *Electrochem. Solid State Lett.* **2004**, 7, F73–F76.
- [3] Teherani, F. H.; Okyay, A. K.; Oruç, F.; Çimen, F.; Aygün, L. E.; Look, D. C.; Rogers, D. J. TiO<sub>2</sub> Thin Film Transistor by Atomic Layer Deposition. *Proc. SPIE* **2013**, 8626, 862616.
- [4] Schroder, D. K. *Semiconductor Material and Device Characterization*. John Wiley & Sons: **2006**.
- [5] Ye, Z.; Yuan, Y.; Xu, H.; Liu, Y.; Luo, J.; Wong, M. Mechanism and Origin of Hysteresis in Oxide Thin-Film Transistor and Its Application on 3-D Nonvolatile Memory. *IEEE Trans. Electron Devices* **2017**, 64, 438–446.
- [6] Lee, D. J.; Lim, J. W.; Mun, J. K.; Yun, S. J. Improved stability of electrical properties of nitrogen-added Al<sub>2</sub>O<sub>3</sub> films grown by PEALD as gate dielectric. *Materials Research Bulletin* **2016**, 83, 597-602
- [7] Crupi, I.; Degraeve, R.; Govoreanu, B.; Brunco, D. P.; Roussel, P. J.; Van Houdt, J. Energy and Spatial Distribution of Traps in SiO<sub>2</sub>/Al<sub>2</sub>O<sub>3</sub> nMOSFETs. *IEEE Trans. Device and Materials Reliability* **2006**, 6 (4), 509-516.

- [8] Zheng, X. F.; Zhang, W. D.; Govoreanu, B.; Aguado, D. R.; Zhang, J. F.; Van Houdt, J. Energy and Spatial Distributions of Electron Traps Throughout SiO<sub>2</sub>/Al<sub>2</sub>O<sub>3</sub> Stacks as the IPD in Flash Memory Application. *IEEE Trans. Electron Devices* **2010**, *57* (1), 288-296.
